# Supplementary material for: Machine learning-assisted genomic profiling to identify differences between Bacillus Calmette-Guérin (BCG) vaccine strains and non-BCG wild-type Mycobacterium bovis
Source: PeerJ journal article supplement (doi:10.7717/peerj-cs.3211), 2025-09-26
Supplement: Codebook.docx [file Codebook.docx]

Numerical-to-Factor Codebook

Variable Name: BCG

Data Type: Categorical (coded numerically)

Description: Classification of Mycobacterium strains

| Numerical Code | Factor Level | Biological Interpretation |
| --- | --- | --- |
| 0 | Non-BCG Strain | Wild-type strains of *Mycobacterium bovis* |
| 1 | BCG Vaccine Strain | Attenuated strains from BCG vaccine sublineages |
