# Supplementary material for: Machine learning-assisted genomic profiling to identify differences between Bacillus Calmette-Guérin (BCG) vaccine strains and non-BCG wild-type Mycobacterium bovis
Source: PeerJ journal article supplement (doi:10.7717/peerj-cs.3211), 2025-09-26
Supplement: Excel_file1.xlsx [file Excel_file1.xlsx]

## Sheet: Sheet1
Accession number	Genome size	Contig number	Fasta file	Assembly level	BCG	URL
AM408590.1	4.3Mb	1	GCA_000009445.1_ASM944v1_genomic.fna	Complete gemome	YES	https://www.ncbi.nlm.nih.gov/datasets/genome/GCA_000009445.1
AP010918.1	4.3Mb	1	GCA_000010685.1_ASM1068v1_genomic.fna	Complete gemome	YES	https://www.ncbi.nlm.nih.gov/datasets/genome/GCA_000010685.1
CP003494.1	4.2Mb	1	GCA_000194075.3_ASM19407v3_genomic.fna	Complete gemome	YES	https://www.ncbi.nlm.nih.gov/datasets/genome/GCA_000194075.3
CP002095.1	4.3Mb	1	GCA_000234725.1_ASM23472v1_genomic.fna	Complete gemome	YES	https://www.ncbi.nlm.nih.gov/datasets/genome/GCA_000234725.1
CP003900.2	4.3Mb	1	GCA_000338715.2_ASM33871v2_genomic.fna	Complete gemome	YES	https://www.ncbi.nlm.nih.gov/datasets/genome/GCA_000338715.2
AM412059.2	4.2Mb	1	GCA_000967285.1_ASM96728v1_genomic.fna	Complete gemome	YES	https://www.ncbi.nlm.nih.gov/datasets/genome/GCA_000967285.1
CP008744.1	4.3Mb	1	GCA_001043255.1_ASM104325v1_genomic.fna	Complete gemome	YES	https://www.ncbi.nlm.nih.gov/datasets/genome/GCA_001043255.1
CP009243.1	4.3Mb	1	GCA_001274555.1_ASM127455v1_genomic.fna	Complete gemome	YES	https://www.ncbi.nlm.nih.gov/datasets/genome/GCA_001274555.1
CUWN01000001.1	4.2Mb	1	GCA_001287005.1_bcg_Phipps_genomic.fna	Complete gemome	YES	https://www.ncbi.nlm.nih.gov/datasets/genome/GCA_001287005.1
CUWK01000001.1	4.2Mb	1	GCA_001287045.1_bcg_Moreau_genomic.fna	Complete gemome	YES	https://www.ncbi.nlm.nih.gov/datasets/genome/GCA_001287045.1
CUWE01000001.1	4.2Mb	1	GCA_001287065.1_bcg_Birkhaug_genomic.fna	Complete gemome	YES	https://www.ncbi.nlm.nih.gov/datasets/genome/GCA_001287065.1
CUWP01000001.1	4.2Mb	1	GCA_001287105.1_bcg_Sweden_genomic.fna	Complete gemome	YES	https://www.ncbi.nlm.nih.gov/datasets/genome/GCA_001287105.1
CUWH01000001.1	4.2Mb	1	GCA_001287125.1_bcg_Copenhagen_genomic.fna	Complete gemome	YES	https://www.ncbi.nlm.nih.gov/datasets/genome/GCA_001287125.1
CUWL01000001.1	4.2Mb	1	GCA_001287165.1_bcg_Pasteur_genomic.fna	Complete gemome	YES	https://www.ncbi.nlm.nih.gov/datasets/genome/GCA_001287165.1
CUWJ01000001.1	4.2Mb	1	GCA_001287185.1_bcg_Glaxo_genomic.fna	Complete gemome	YES	https://www.ncbi.nlm.nih.gov/datasets/genome/GCA_001287185.1
CUWO01000001.1	4.2Mb	1	GCA_001287205.1_bcg_Russia_genomic.fna	Complete gemome	YES	https://www.ncbi.nlm.nih.gov/datasets/genome/GCA_001287205.1
CUWM01000001.1	4.2Mb	1	GCA_001287225.1_bcg_Prague_genomic.fna	Complete gemome	YES	https://www.ncbi.nlm.nih.gov/datasets/genome/GCA_001287225.1
CUWG01000001.1	4.2Mb	1	GCA_001287245.1_bcg_China_genomic.fna	Complete gemome	YES	https://www.ncbi.nlm.nih.gov/datasets/genome/GCA_001287245.1
CUWF01000001.1	4.2Mb	1	GCA_001287325.1_bcg_Connaught_genomic.fna	Complete gemome	YES	https://www.ncbi.nlm.nih.gov/datasets/genome/GCA_001287325.1
CUWQ01000001.1	4.2Mb	1	GCA_001287365.1_bcg_Tice_genomic.fna	Complete gemome	YES	https://www.ncbi.nlm.nih.gov/datasets/genome/GCA_001287365.1
CUWR01000001.1	4.2Mb	1	GCA_001287425.1_bcg_Tokyo_genomic.fna	Complete gemome	YES	https://www.ncbi.nlm.nih.gov/datasets/genome/GCA_001287425.1
CUWI01000001.1	4.2Mb	1	GCA_001287485.1_bcg_Frappier_genomic.fna	Complete gemome	YES	https://www.ncbi.nlm.nih.gov/datasets/genome/GCA_001287485.1
CP010331.1	4.3Mb	1	GCA_001544735.1_ASM154473v1_genomic.fna	Complete gemome	YES	https://www.ncbi.nlm.nih.gov/datasets/genome/GCA_001544735.1
CP014566.1	4.3Mb	1	GCA_001580385.1_ASM158038v1_genomic.fna	Complete gemome	YES	https://www.ncbi.nlm.nih.gov/datasets/genome/GCA_001580385.1
CP033310.1	4.2Mb	1	GCA_003703995.1_ASM370399v1_genomic.fna	Complete gemome	YES	https://www.ncbi.nlm.nih.gov/datasets/genome/GCA_003703995.1
CP033311.1	4.2Mb	1	GCA_003704015.1_ASM370401v1_genomic.fna	Complete gemome	YES	https://www.ncbi.nlm.nih.gov/datasets/genome/GCA_003704015.1
CP064405.1	4.3Mb	1	GCA_015482805.1_ASM1548280v1_genomic.fna	Complete gemome	YES	https://www.ncbi.nlm.nih.gov/datasets/genome/GCA_015482805.1
CP085532.1	4.2Mb	1	GCA_028752235.1_ASM2875223v1_genomic.fna	Complete gemome	YES	https://www.ncbi.nlm.nih.gov/datasets/genome/GCA_028752235.1
LT708304.1	4.3M	1	GCA_000195835.3_ASM19583v2_genomic.fna	Complete gemome	NO	https://www.ncbi.nlm.nih.gov/datasets/genome/GCA_000195835.3
KK308729.1 et al	4.2M	136	GCA_000649655.1_Myco_bovi_Bz_31150_V1_genomic.fna	Scaffold	NO	https://www.ncbi.nlm.nih.gov/datasets/genome/GCA_000649655.1
KK308865.1 et al	4.1M	206	GCA_000649675.1_Myco_bovi_B2_7505_V1_genomic.fna	Scaffold	NO	https://www.ncbi.nlm.nih.gov/datasets/genome/GCA_000649675.1
KK338874.1 et al	4.3M	4	GCA_000666385.1_Myco_bovi_MAL010093_V1_genomic.fna	Scaffold	NO	https://www.ncbi.nlm.nih.gov/datasets/genome/GCA_000666385.1
CP015773.2	4.2M	1	GCA_000934325.3_ASM93432v3_genomic.fna	Complete gemome	NO	https://www.ncbi.nlm.nih.gov/datasets/genome/GCA_000934325.3
CDHF01000001.1 et al	4.2M	49	GCA_000947875.1_Genome_assembly_of_Mycobacterium_bovis_MB1_genomic.fna	Scaffold	NO	https://www.ncbi.nlm.nih.gov/datasets/genome/GCA_000947875.1
CDHH01000002.1 et al	4.2M	94	GCA_000947895.1_Assembly_of_the_genome_MB3_genomic.fna	Scaffold	NO	https://www.ncbi.nlm.nih.gov/datasets/genome/GCA_000947895.1
CP012095.1	4.3M	1	GCA_001078615.1_ASM107861v1_genomic.fna	Complete gemome	NO	https://www.ncbi.nlm.nih.gov/datasets/genome/GCA_001078615.1
CP010332.1	4.2M	1	GCA_001544775.1_ASM154477v1_genomic.fna	Complete gemome	NO	https://www.ncbi.nlm.nih.gov/datasets/genome/GCA_001544775.1
CP023708.2	4.3M	1	GCA_002504245.2_ASM250424v2_genomic.fna	Complete gemome	NO	https://www.ncbi.nlm.nih.gov/datasets/genome/GCA_002504245.2
CP027035.1	4.3M	1	GCA_002975475.1_ASM297547v1_genomic.fna	Complete gemome	NO	https://www.ncbi.nlm.nih.gov/datasets/genome/GCA_002975475.1
MWXE01000001.1 et al	4.3M	446	GCA_002982285.1_ASM298228v1_genomic.fna	Scaffold	NO	https://www.ncbi.nlm.nih.gov/datasets/genome/GCA_002982285.1
PYQG02000074.1 et al	4.2M	111	GCA_003027855.2_ASM302785v2_genomic.fna	Scaffold	NO	https://www.ncbi.nlm.nih.gov/datasets/genome/GCA_003027855.2
PYQF02000017.1 et al	4.2M	101	GCA_003027875.2_ASM302787v2_genomic.fna	Scaffold	NO	https://www.ncbi.nlm.nih.gov/datasets/genome/GCA_003027875.2
CP039851.1	4.2M	1	GCA_005155785.1_ASM515578v1_genomic.fna	Complete gemome	NO	https://www.ncbi.nlm.nih.gov/datasets/genome/GCA_005155785.1
CP039850.1	4.3M	1	GCA_005156105.1_ASM515610v1_genomic.fna	Complete gemome	NO	https://www.ncbi.nlm.nih.gov/datasets/genome/GCA_005156105.1
VOIY01000101.1 et al	4.2M	102	GCA_007922985.1_ASM792298v1_genomic.fna	Scaffold	NO	https://www.ncbi.nlm.nih.gov/datasets/genome/GCA_007922985.1
VOIZ01000101.1 et al	4.2M	106	GCA_007922995.1_ASM792299v1_genomic.fna	Scaffold	NO	https://www.ncbi.nlm.nih.gov/datasets/genome/GCA_007922995.1
CP040832.1	4.3M	1	GCA_008033095.1_ASM803309v1_genomic.fna	Complete gemome	NO	https://www.ncbi.nlm.nih.gov/datasets/genome/GCA_008033095.1
JAGEUB010000003.1 et al	4.3M	18	GCA_018305025.1_ASM1830502v1_genomic.fna	Scaffold	NO	https://www.ncbi.nlm.nih.gov/datasets/genome/GCA_018305025.1
JAGEUC010000003.1 et al	4.3M	20	GCA_018305045.1_ASM1830504v1_genomic.fna	Scaffold	NO	https://www.ncbi.nlm.nih.gov/datasets/genome/GCA_018305045.1
JAHCXD010000001.1 et al	4.2M	16	GCA_019075565.1_ASM1907556v1_genomic.fna	Scaffold	NO	https://www.ncbi.nlm.nih.gov/datasets/genome/GCA_019075565.1
JACKUG010000002.1 et al	4.2M	51	GCA_025822665.1_ASM2582266v1_genomic.fna	Scaffold	NO	https://www.ncbi.nlm.nih.gov/datasets/genome/GCA_025822665.1
CP112996.1	4.3M	1	GCA_026727575.1_ASM2672757v1_genomic.fna	Complete gemome	NO	https://www.ncbi.nlm.nih.gov/datasets/genome/GCA_026727575.1
CP112997.1	4.2M	1	GCA_026727615.1_ASM2672761v1_genomic.fna	Complete gemome	NO	https://www.ncbi.nlm.nih.gov/datasets/genome/GCA_026727615.1
CP096839.1	4.2M	1	GCA_028583125.1_ASM2858312v1_genomic.fna	Complete gemome	NO	https://www.ncbi.nlm.nih.gov/datasets/genome/GCA_028583125.1
CP096840.1	4.3M	1	GCA_028583145.1_ASM2858314v1_genomic.fna	Complete gemome	NO	https://www.ncbi.nlm.nih.gov/datasets/genome/GCA_028583145.1
CP096841.1	4.2M	1	GCA_028583165.1_ASM2858316v1_genomic.fna	Complete gemome	NO	https://www.ncbi.nlm.nih.gov/datasets/genome/GCA_028583165.1
CP096842.1	4.3M	1	GCA_028583185.1_ASM2858318v1_genomic.fna	Complete gemome	NO	https://www.ncbi.nlm.nih.gov/datasets/genome/GCA_028583185.1
CP096843.1	4.2M	1	GCA_028583205.1_ASM2858320v1_genomic.fna	Complete gemome	NO	https://www.ncbi.nlm.nih.gov/datasets/genome/GCA_028583205.1
CP096844.1	4.3M	1	GCA_028583225.1_ASM2858322v1_genomic.fna	Complete gemome	NO	https://www.ncbi.nlm.nih.gov/datasets/genome/GCA_028583225.1
CP096845.1	4.2M	1	GCA_028583245.1_ASM2858324v1_genomic.fna	Complete gemome	NO	https://www.ncbi.nlm.nih.gov/datasets/genome/GCA_028583245.1
CP096846.1	4.2M	1	GCA_028583265.1_ASM2858326v1_genomic.fna	Complete gemome	NO	https://www.ncbi.nlm.nih.gov/datasets/genome/GCA_028583265.1
CP096847.1	4.2M	1	GCA_028583285.1_ASM2858328v1_genomic.fna	Complete gemome	NO	https://www.ncbi.nlm.nih.gov/datasets/genome/GCA_028583285.1
CP096848.1	4.2M	1	GCA_028583305.1_ASM2858330v1_genomic.fna	Complete gemome	NO	https://www.ncbi.nlm.nih.gov/datasets/genome/GCA_028583305.1
CP117298.1	4.2M	1	GCA_028768425.1_ASM2876842v1_genomic.fna	Complete gemome	NO	https://www.ncbi.nlm.nih.gov/datasets/genome/GCA_028768425.1
CP133602.1	4.3M	1	GCA_031199985.1_ASM3119998v1_genomic.fna	Complete gemome	NO	https://www.ncbi.nlm.nih.gov/datasets/genome/GCA_031199985.1
CP133604.1	4.3M	1	GCA_031201325.1_ASM3120132v1_genomic.fna	Complete gemome	NO	https://www.ncbi.nlm.nih.gov/datasets/genome/GCA_031201325.1
CP133603.1	4.3M	1	GCA_031201695.1_ASM3120169v1_genomic.fna	partial genome	NO	https://www.ncbi.nlm.nih.gov/datasets/genome/GCA_031201695.1
CP133601.1	4.3M	1	GCA_031201715.1_ASM3120171v1_genomic.fna	partial genome	NO	https://www.ncbi.nlm.nih.gov/datasets/genome/GCA_031201715.1
LR699570.1	4.3M	1	GCA_902459825.2_MB3601_COMBINED_annotated_genomic.fna	Complete gemome	NO	https://www.ncbi.nlm.nih.gov/datasets/genome/GCA_902459825.2
LR734384.1 et al	4.2M	157	GCA_902506665.1_P9979_genomic.fna	Scaffold	NO	https://www.ncbi.nlm.nih.gov/datasets/genome/GCA_902506665.1
LR734095.1 et al	4.3M	167	GCA_902506725.1_P9980_genomic.fna	Scaffold	NO	https://www.ncbi.nlm.nih.gov/datasets/genome/GCA_902506725.1
LR735399.1 et al	4.2M	130	GCA_902509475.1_Q0209_genomic.fna	Scaffold	NO	https://www.ncbi.nlm.nih.gov/datasets/genome/GCA_902509475.1
