# Supplementary material for: Machine learning-assisted genomic profiling to identify differences between Bacillus Calmette-Guérin (BCG) vaccine strains and non-BCG wild-type Mycobacterium bovis
Source: PeerJ journal article supplement (doi:10.7717/peerj-cs.3211), 2025-09-26
Supplement: Excel_file2.xlsx [file Excel_file2.xlsx]

## Sheet: detected_topgenes_list_train7_b
NAME	eccCb1	group_6465	rsmG_2	nifH_2	dnaJ1	dtd	group_1597	group_749	esxA	treZ	group_6746	rpoC	kdpD	trmR	group_1983	group_6385	yhjD	nlhH_1	tesB_2	ino1	raaS	group_3758	gyrB1_2	crp	group_3540	group_2709	group_3486	murI	cwlM_2	uvrB	group_2311	group_2308	group_6874	glgM	gltX	group_918	recF_2	group_3529	lipR	xylB	parB_2	group_5813	group_2817	cmoB	group_5966	group_3256	folK	BCG
GCA_000009445.1_ASM944v1_genomic.fna_prokka_result.faa	58.8	277.9			363.1	111.9	64.1			92.7	100.7	1522.4	681.6	82.9	561.1	77.9	181.7	265.3	266.8	446.4	44.9	31.8		158.6	483.6		257.8	229.6		981.5	96.2	89.4	29.2	163.2	414.4	31.4		73.9	244.6	169.8		36.7	46.6	32.3	31.4	356.2	93	1
GCA_000010685.1_ASM1068v1_genomic.fna_prokka_result.faa	58.8	277.9			363.1	111.9	64.1			92.7	100.7	1521.3	681.6	82.9	561.1	77.9	181.7	265.3	266.8	446.4	44.9	31.8		160.4	483.6		257.8	229.6		981.5	96.2	89.4	29.2	163.2	414.4	31.4		73.9	244.6	169.8		36.7	46.6	32.3	31.4	356.2	93	1
GCA_000194075.3_ASM19407v3_genomic.fna_prokka_result.faa	58.8	277.9			363.1	111.9	64.1			92.7	100.7	1522.4	681.6	82.9	561.1	77.9	181.7	265.3	266.8	446.4	44.9	31.8		158.6	483.6		257.8	229.6		981.5	96.2	89.4	29.2	163.2	414.4	31.4		73.9	244.6	169.8		36.7	46.6	32.3	31.4	356.2	93	1
GCA_000195835.3_ASM19583v2_genomic.fna_prokka_result.faa	58.1	277			363.3	115.3	64.7	40.3	15.8	503.5	101.3	1524	685.3	79.1	407.6	79.4	182.6	264.6	266.8	447.6	45.3			164.5	487.5		262.1	231.5		980.3	96.8	89.4	28.6	163.4	415.2	31.1		75	244.9	173.7		34.7	45.6	32.2	32.3	358.7	95.7	0
GCA_000234725.1_ASM23472v1_genomic.fna_prokka_result.faa	58.8	277.9			363.1	111.9	64.1			92.7	100.7	1522.4	681.6	82.9	561.1	77.9	181.7	265.3	266.8	446.4	44.9	31.8		158.6	483.6		257.8	229.6		981.5	96.2	89.4	29.2	163.2	414.4			73.9	244.6	169.8		36.7	46.6	32.3	31.4	356.2	93	1
GCA_000338715.2_ASM33871v2_genomic.fna_prokka_result.faa	58.8	277.9			363.1	111.9	64.1			92.7	100.7	1522.4	681.6	82.9	561.1	77.9	181.7	265.3	266.8	446.4	44.9	31.8		158.6	483.6		257.8	229.6		981.5	96.2	89.4	29.2	163.2	414.4	31.4		73.9	244.6	169.8		36.7	46.6	32.3	31.4	356.2	93	1
GCA_000649655.1_Myco_bovi_Bz_31150_V1_genomic.fna_prokka_result.faa	58.1	277			363.3	115.3	64.7	38.9	15.8	501.4	101.3	1524	685.3	79.1	560.4	79.4	182.6	264.6	279.6	447.6	45.3			164.5	487.5		262.1	231.5		980.3	96.8	89.4	28.6	163.4	415.2			75	244.9	173.7		34.7	45.1	32.2	32.3	358.7	95.7	0
GCA_000649675.1_Myco_bovi_B2_7505_V1_genomic.fna_prokka_result.faa	58.1	277			363.3	139	64.7	38.8	15.8		102.7	1524	685.1	79.1	560.9	79.4	182.6		263.2	447.6	45.3		818.7	164.5	500.2		262.1	231.5		980.3	96.8	89.4	28.7	163	415.2	30.9		74.8	244.9	176.5		34.7	45	32.2	32.3	358.7	95.7	0
GCA_000666385.1_Myco_bovi_MAL010093_V1_genomic.fna_prokka_result.faa	58.1	277			363.3	115.3	64.6	40.3	15.8	504.3	101.3	1524	685.3	79.1	560.4	79.4	182.6	264.6	266.8	447.6	45.3			164.5	487.5		262.1	231.5		980.3	96.8	89.4	28.6	163	415.2	31.1		75	244.9	173.7		34.7	45.6	32.2	32.3	358.7	95.7	0
GCA_000934325.3_ASM93432v3_genomic.fna_prokka_result.faa	58.1	277			363.3	115.3	64.7	40.3	15.8	503.5	101.3	1524	685.3	79.1	560.4	79.4	183.4	264.6	266.8	447.6	45.3			164.5	487.5		262.1	231.5		980.3	96.8	89.4	28.6	163.4	415.2	31.1		75	244.9	173.7		34.7	45.6	32.2	32.3	358.7	95.7	0
GCA_000947875.1_Genome_assembly_of_Mycobacterium_bovis_MB1_genomic.fna_prokka_result.faa	58.1	277			363.3	115.3	64.7	40.3	15.8	503.5	101.3	1524	685.3	79.1	560.4	79.4	182.6	264.6	266.8	447.6	45.3			164.5	486.6		262.1	231.7		980.3	96.8	89	28.6	163.4	415.2	30		75	244.9	173.7		34.7	45.1	32.2	32.3	358.7	95.7	0
GCA_000947895.1_Assembly_of_the_genome_MB3_genomic.fna_prokka_result.faa	58.1	277			363.3	115.3		37.9	15.8	503.5	101.3	1524	687	79.1	560.4	79.4	182.6	264.6	279.6	447.6	45.3			164.5	487.5		262.1	231.5		980.3	96.8	89.4	28.6	163.4	415.2	30		75	244.9	173.7		34.7	43.3	32.2	32.3	358.7	95.7	0
GCA_000967285.1_ASM96728v1_genomic.fna_prokka_result.faa	58.8	277.9			363.1	111.9	64.1			92.7	100.7	1521	681.6	82.9	561.1	77.9	181.7	265.3	266.8	446.4	44.9	31.8		163.7	483.6		257.8	229.6		981.5	96.2	89.4	29.2	163.2	414.4	31.4		73.9	244.6	169.8		36.7	46.6	32.3	31.4	356.2	93	1
GCA_001043255.1_ASM104325v1_genomic.fna_prokka_result.faa	58.8	277.9			363.1	111.9	64.1			92.7	100.7	1522.4	681.6	82.9	561.1	77.9	181.7	265.3	266.8	446.4	44.9	31.8		158.6	483.6		257.8	229.6		981.5	96.2	89.4	29.2	163.2	414.4	31.4	35.6	73.9	244.6	169.8		36.7	46.6	32.3	31.4	356.2	93	1
GCA_001078615.1_ASM107861v1_genomic.fna_prokka_result.faa	58.1	277			363.3	115.3	64.7	40.3	15.8	503.5	101.3	1524	685.3	79.1	560.4	79.4	182.6	264.6	266.8	447.6	45.3			164.5	487.5		262.1	231.5		980.3	96.8	89.4	28.6	163.4	415.2	31.1		75	244.9	173.7		34.7	45.6	32.2	32.3	358.7	95.7	0
GCA_001274555.1_ASM127455v1_genomic.fna_prokka_result.faa	58.8	277.9			363.1	111.9	64.1			92.7	100.7	1522.4	681.6	82.9	561.1	77.9	181.7	265.3	266.8	446.4	44.9	31.8		163.7	483.6		257.8	229.6		981.5	96.2	89.4	29.2	163.2	414.4	31.4		73.9	244.6	169.8		36.7	46.6	32.3	31.4	356.2	93	1
GCA_001287005.1_bcg_Phipps_genomic.fna_prokka_result.faa	58.8	277.9			363.1	111.9	64.1			92.7	100.7	1522.4	681.6	82.9	561.1	77.9	181.7	265.3	266.8	446.4	44.9	31.8		158.6	483.6		257.8	229.6		981.5	96.2	89.4	29.2	163.2	414.4	31.4		73.9	244.6	169.8		36.7	46.6	32.3	31.4	356.2	93	1
GCA_001287045.1_bcg_Moreau_genomic.fna_prokka_result.faa	58.8	277.9			363.1	111.9	64.1			92.7	100.7	1521	681.6	82.9	561.1	77.9	181.7	265.3	266.8	446.4	44.9	31.8		163.7	483.6		257.8	229.6		981.5	96.2	89.4	29.2	163.2	414.4	31.4		73.9	244.6	169.8		36.7	46.6	32.3	31.4	356.2	93	1
GCA_001287065.1_bcg_Birkhaug_genomic.fna_prokka_result.faa	58.8	277.9			363.1	111.9	64.1			92.7	100.7	1522.4	681.6	82.9	561.1	77.9	181.7	265.3	266.8	446.4	44.9	31.8		163.7	483.6		257.8	229.6		981.5	96.2	89.4	29.2	163.2	414.4	31.4		73.9	244.6	169.8		36.7	46.6	32.3	31.4	356.2	93	1
GCA_001287105.1_bcg_Sweden_genomic.fna_prokka_result.faa	58.8	277.9			363.1	111.9	64.1			92.7	100.7	1522.4	681.6	82.9	561.1	77.9	181.7	265.3	266.8	446.4	44.9	31.8		163.7	483.6		257.8	229.6		981.5	96.2	89.4	29.2	163.2	414.4	31.4		73.9	244.6	169.8		36.7	46.6	32.3	31.4	356.2	93	1
GCA_001287125.1_bcg_Copenhagen_genomic.fna_prokka_result.faa	58.8	277.9			363.1	111.9	64.1			92.7	100.7	1522.4	681.6	82.9	561.1	77.9	181.7	265.3	266.8	446.4	44.9	31.8		158.6	483.6		257.8	229.6		981.5	96.2	89.4	29.2	163.2	414.4	31.4		73.9	244.6	169.8		36.7	46.6	32.3	31.4	356.2	93	1
GCA_001287165.1_bcg_Pasteur_genomic.fna_prokka_result.faa	58.8	277.9			363.1	111.9	64.1			92.7	100.7	1522.4	681.6	82.9	561.1	77.9	181.7	265.3	266.8	446.4	44.9	31.8		158.6	483.6		257.8	229.6		981.5	96.2	89.4	29.2	163.2	414.4	31.4		73.9	244.6	169.8		36.7	46.6	32.3	31.4	356.2	93	1
GCA_001287185.1_bcg_Glaxo_genomic.fna_prokka_result.faa	58.8	277.9			363.1	111.9	64.1			92.7	100.7	1522.4	681.6	82.9	561.1	77.9	181.7	265.3	266.8	446.4	44.9	31.8		158.6	483.6		257.8	229.6		981.5	96.2	89.4	29.2	163.2	414.4	31.4		73.9	244.6	169.8		36.7	46.6	32.3	31.4	356.2	93	1
GCA_001287205.1_bcg_Russia_genomic.fna_prokka_result.faa	58.8	277.9			363.1	111.9	64.1			92.7	100.7	1522.4	681.6	82.9	561.1	77.9	181.7	265.3	266.8	446.4	44.9	31.8		163.7	483.6		257.8	229.6		981.5	96.2	89.4	29.2	163.2	414.4	31.4		73.9	244.6	169.8		36.7	46.6	32.3	31.4	356.2	93	1
GCA_001287225.1_bcg_Prague_genomic.fna_prokka_result.faa	58.8	277.9			363.1	111.9	64.1			92.7	100.7	1522.4	681.6	82.9	561.1	77.9	181.7	265.3	266.8	446.4	44.9	31.8		158.6	483.6		257.8	229.6		981.5	96.2	89.4	29.2	163.2	414.4	31.4		73.9	244.6	169.8		36.7	46.6	32.3	31.4	356.2	93	1
GCA_001287245.1_bcg_China_genomic.fna_prokka_result.faa	58.8	277.9			363.1	111.9	64.1			92.7	100.7	1522.4	681.6	82.9	561.1	77.9	181.7	265.3	266.8	446.4	44.9	31.8		158.6	483.6		257.8	229.6		981.5	96.2	89.4	29.2	163.2	414.4	31.4		73.9	244.6	169.8		36.7	46.6	32.3	31.4	356.2	93	1
GCA_001287325.1_bcg_Connaught_genomic.fna_prokka_result.faa	58.8	277.9			363.1	111.9	64.1			92.7	100.7	1522.4	681.6	82.9	561.1	77.9	181.7	265.3	266.8	446.4	44.9	31.8		158.6	483.6		257.8	229.6		981.5	96.2	89.4	29.2	163.2	414.4	31.4		73.9	244.6	169.8		36.7	46.6	32.3	31.4	356.2	93	1
GCA_001287365.1_bcg_Tice_genomic.fna_prokka_result.faa	58.8	277.9			363.1	111.9	64.1			92.7	100.7	1522.4	681.6	82.9	561.1	77.9	181.7	265.3	266.8	446.4	44.9	31.8		158.6	483.6		257.8	229.6		981.5	96.2	89.4	29.2	163.2	414.4	31.4		73.9	244.6	169.8		36.7	46.6	32.3	31.4	356.2	93	1
GCA_001287425.1_bcg_Tokyo_genomic.fna_prokka_result.faa	58.8	277.9			363.1	111.9	64.1			92.7	100.7	1521.3	681.6	82.9	561.1	77.9	181.7	265.3	266.8	446.4	44.9	31.8		160.4	483.6		257.8	229.6		981.5	96.2	89.4	29.2	163.2	414.4	31.4		73.9	244.6	169.8		36.7	46.6	32.3	31.4	356.2	93	1
GCA_001287485.1_bcg_Frappier_genomic.fna_prokka_result.faa	58.8	277.9			363.1	111.9	64.1			92.7	100.7	1522.4	681.6	82.9	561.1	77.9	181.7	265.3	266.8	446.4	44.9	31.8		158.6	483.6		257.8	229.6		981.5	96.2	89.4	29.2	163.2	414.4	31.4		73.9	244.6	169.8		36.7	46.6	32.3	31.4	356.2	93	1
GCA_001544735.1_ASM154473v1_genomic.fna_prokka_result.faa	58.8	277.9			288.3	111.9				92.7	100.7	1522.4	648.9	82.9	561.1	77.9	181.7	265.3	213.1	446.4	44.9	31.8		158.6	483.6		191.8	148		981.5	52.6	89.4	29.2	163.2	414.4	31.4		73.7	145.3	134.4		36.7	46.6	32.3	31.4	309.1	93	1
GCA_001544775.1_ASM154477v1_genomic.fna_prokka_result.faa	58.1	277			363.3	115.3	64.7	40.3	15.8	503.5	101.3	1524	685.3	79.1	560.4	79.4	182.6	264.6	266.8	447.6	45.3			164.5	487.5		262.1	231.5		980.3	96.8	89.4	28.6	163.4	415.2	31.1		75	244.9	173.7		34.7	45.6	32.2	32.3	358.7	95.7	0
GCA_001580385.1_ASM158038v1_genomic.fna_prokka_result.faa	58.8	277.9			363.1	111.9	64.1			92.7	100.7	1521.3	681.6	82.9	561.1	77.9	181.7	265.3	266.8	446.4	44.9	31.8		160.4	483.6		257.8	229.6		981.5	96.2	89.4	29.2	163.2	414.4	31.4		73.9	244.6	169.8		36.7	46.6	32.3	31.4	356.2	93	1
GCA_002504245.2_ASM250424v2_genomic.fna_prokka_result.faa	58.1	277			363.3	115.3	64.7		15.8	503.5	101.3	1524	685.3	79.1	560.4	79.4	182.6	264.6	266.8	447.6	45.3			164.5	487.5		262.1	231.5		980.3	96.8	89.4	28.6	163.4	415.2	31.1		75	244.9	173.7		34.7	45.6	32.2	32.3	358.7	95.7	0
GCA_002975475.1_ASM297547v1_genomic.fna_prokka_result.faa	58.1	277			363.3	115.3	64.7	40.3	15.8	503.5	101.3	1524	685.3	79.1	560.4	79.4	182.6	260.6	266.8	447.6	45.3			164.5	487.5		262.1	231.5		980.3	96.8	89.4	28.6	163.4	415.2	31.1		75	244.9	173.7		34.7	45.6	32.2	32.3	358.7	95.7	0
GCA_002982285.1_ASM298228v1_genomic.fna_prokka_result.faa	58.1	277			363.3	139	64.7	38.9	15.8	503.5	101.3	1510.3	685.3	79.1	560.4	79.4	182.6	264.6		447.6	45.3			164.5	487.5		262.1	231.5		980.3	96.8	89.4	28.6	163.4	415.2	31.1		75	244.9	173.7		34.7	45.1	32.2	32.3	358.7	95.7	0
GCA_003027855.2_ASM302785v2_genomic.fna_prokka_result.faa	58.1	277			363.3	115.3	64.7	37.9	15.8	503.5	101.3	1524	685.3	79.1	560.4	79.4	183.4	264.6	266.8	447.6	45.3			164.5	487.5		262.1	231.5		980.3	96.8	89.4	28.6	163.4	415.2	30		75	244.9	173.7		34.7	45.6	32.2	32.3	358.7	95.7	0
GCA_003027875.2_ASM302787v2_genomic.fna_prokka_result.faa	58.1	277			363.3	115.3	64.7	37.9	15.8	503.5	101.3	1524	684.8	79.1	560.4	79.4	182.6	264.6	266.8	447.6	45.3			164.5	487.5		262.1	231.5		980.3	96.8	89.4	28.6	163.4	415.2	30		75	244.9	173.7		34.7	45.6	32.2	32.3	358.7	95.7	0
GCA_003703995.1_ASM370399v1_genomic.fna_prokka_result.faa	58.8	277			363.3	115.3	33.3			332.4	101.3	1520.6	586.6	79.1	560.4	79.4	182.6	264.7	130.9	446.3	44.6			164.5	487.5		262.1	231.5		980.3	56	89.4	28.6	163	415.2	30.9		75	244.9	173.7		34.7	45.6	32.2	32.3	354.5	95.7	1
GCA_003704015.1_ASM370401v1_genomic.fna_prokka_result.faa	58.8	277.9			363.1	111.9	64.1			92.7	100.7	1522.4	681.6	82.9	561.1	77.9	181.7	265.3	266.8	446.4	44.9	31.8		158.6	483.6		257.8	229.6		981.5	96.2	89.4	29.2	163.2	414.4	31.4		73.9	244.6	169.8		36.7	46.6	32.3	31.4	356.2	93	1
GCA_005155785.1_ASM515578v1_genomic.fna_prokka_result.faa	58.8	277.9	112.2	297.4	363.1	111.9	64.1			92.7	100.7	1522.4	681.6	82.9	561.1	77.9	181.7	265.3	244.2	446.4	44.9	31.8	311.3	158.6	483.6	23.2	257.8	229.6	79.3	981.5	96.2	88.5	29.2	163.2	414.4	31.4	35.6	73.9	244.6	169.8	247.4	36.7	46.6	32.3	31.4	356.2	93	0
GCA_005156105.1_ASM515610v1_genomic.fna_prokka_result.faa	58.8	277.9	112.2	297.4	363.1	111.9	64.1			92.7	100.7	1522.4	681.6	82.9	561.1	77.9	181.7	265.3	266.8	446.4	44.9	31.8	311.3	158.6	483.6	23.2	257.8	229.6	79.3	981.5	96.2	88.5	29.2	163.2	414.4	31.4	35.6	73.9	244.6	169.8	247.4	36.7	46.6	32.3	31.4	356.2	93	0
GCA_007922985.1_ASM792298v1_genomic.fna_prokka_result.faa	58.1	277			363.3	115.3	64.7	37.9	15.8	503.5	101.3	1524	685.3	79.1	560.4	79.4	183.4	264.6	266.8	447.6	45.3			164.5	487.5		262.1	231.5		980.3	96.8	89.4	28.6	163.4	415.2	30		75	244.9	173.7		34.7	45.6	32.2	32.3	358.7	95.7	0
GCA_007922995.1_ASM792299v1_genomic.fna_prokka_result.faa	58.1	277			363.3	115.3	64.7	37.9	15.8	503.5	101.3	1524	685.3	79.1	560.4	79.4	183.4	264.6	266.8	447.6	45.3			164.5	487.5		262.1	231.5		980.3	96.8	89.4	28.6	163.4	415.2	30		75	244.9	173.7		34.7	45.6	32.2	32.3	358.7	95.7	0
GCA_008033095.1_ASM803309v1_genomic.fna_prokka_result.faa	58.1	277			363.3	115.3	64.7	40.3	15.8	503.5	101.3	1524	685.3	79.1	560.4	79.4	183.4	264.6	266.8	447.6	45.3			164.5	487.5		262.1	231.5		980.3	96.8	89.4	28.6	163.4	415.2	31.1		75	244.9	173.7		34.7	45.6	32.2	32.3	358.7	95.7	0
GCA_015482805.1_ASM1548280v1_genomic.fna_prokka_result.faa	58.8	277.9			363.1	111.9	64.1			92.7	100.7	1522.4	681.6	82.9	561.1	77.9	181.7	265.3	266.8	446.4	44.9	31.8		163.7	483.6		257.8	229.6		981.5	96.2	89.4	29.2	163.2	414.4	31.4		73.9	244.6	169.8		36.7	46.6	32.3	31.4	356.2	93	1
GCA_018305025.1_ASM1830502v1_genomic.fna_prokka_result.faa	58.1	277			363.3	115.3	64.7	40.3	15.8	503.5	101.3	1524	685.3	79.1	560.4	79.4	182.6	264.6	266.8	447.6	45.3			164.5	487.5		262.1	231.5		980.3	96.8	89.4	28.6	163.4	415.2	31.1		75	244.9	173.7		34.7	45.6	32.2	32.3	358.7	95.7	0
GCA_018305045.1_ASM1830504v1_genomic.fna_prokka_result.faa	58.1	277			363.3	115.3	64.7	40.3	15.8	503.5	101.3	1524	685.3	79.1	560.4	79.4	182.6	264.6	266.8	447.6	45.3			164.5	487.5		262.1	231.5		980.3	96.8	89.4	28.6	163.4	415.2	31.1		75	244.9	173.7		34.7	45.6	32.2	32.3	358.7	95.7	0
GCA_019075565.1_ASM1907556v1_genomic.fna_prokka_result.faa	58.1	277			363.3	115.3	64.7	40.3	15.8	503.5	101.3	1524	685.3	79.1	560.4	79.4	182.6	264.6	266.8	447.6	45.3			164.5	487.5		262.1	231.5		980.3	96.8	89.4	28.6	163.4	415.2	31.1		75	244.9	173.7		34.7	45.6	32.2	32.3	358.7	95.7	0
GCA_025822665.1_ASM2582266v1_genomic.fna_prokka_result.faa	58.8	277.9			363.1	111.9	64.1			92.7	100.7	1522.4	681.6	82.9	561.1	77.9	181.7	265.3	279.6	446.4	44.9	31.8		163.7	483.6		257.8	229.6		981.5	96.2	89.4	29.2	163.2	414.4	30.2		73.9	244.6	169.8		36.7	46.6	32.2	31.4	356.2	93	0
GCA_026727575.1_ASM2672757v1_genomic.fna_prokka_result.faa	58.1	277			363.3	115.3	64.7	40.3	15.8	503.5	101.3	1524	685.3	79.1	560.4	79.4	182.6	264.6	266.8	447.6	45.3			164.5	487.5		262.1	231.5		980.3	96.8	89.4	28.6	163.4	415.2	31.1		75	244.9	173.7		34.7	45.6	32.2	32.3	358.7	95.7	0
GCA_026727615.1_ASM2672761v1_genomic.fna_prokka_result.faa	58.1	277			363.3	115.3	64.7	40.3	15.8	503.5	101.3	1524	685.3	79.1	560.4	79.4	182.6	264.6	266.8	447.6	45.3			164.5	487.5		262.1	231.5		980.3	96.8	89.4	28.6	162.8	415.2	31.1		75	244.9	173.7		34.7	45.6	32.2	32.3	358.7	95.7	0
GCA_028583125.1_ASM2858312v1_genomic.fna_prokka_result.faa	58.1	277			363.3	115.3	64.7	40.3	15.8	480.9	101.3	1524	685.3	79.1	560.4	79.4	182.6	264.6	266.8	447.6	45.3			164.5	487.5		262.1	231.5		980.3	96.8	89.4	28.6	163.4	415.2	31.1		75	244.9	173.7		34.7	45.6	32.2	33.6	358.7	95.7	0
GCA_028583145.1_ASM2858314v1_genomic.fna_prokka_result.faa	58.1	274.6			363.3	115.3	64.7	40.3	15.8	503.5	101.3	1524	685.3	79.1	560.4	79.4	182.6	264.6	266.8	447.6	45.3			164.5	487.5		262.1	231.5		980.3	96.8	89.4	28.6	163.4	415.2	31.1		75	244.9	173.7		34.7	45.6	32.2	32.3	358.7	95.7	0
GCA_028583165.1_ASM2858316v1_genomic.fna_prokka_result.faa	58.1	277			363.3	115.3	64.7	40.3	15.8	503.5	101.3	1524	685.3	79.1	560.4	79.4	182.6	264.6	266.8	447.6	45.3			164.5	487.5		262.1	231.5		980.3	96.8	89.4	28.6	163.4	415.2	31.1		75	244.9	173.7		34.7	45.6	32.2	32.3	358.7	95.7	0
GCA_028583185.1_ASM2858318v1_genomic.fna_prokka_result.faa	58.1	277.7			363.3	115.3	64.7	40.3	15.8	503.5	101.3	1524	685.8	79.1		79.4	182.6	264.6	266.8	447.6	45.3			164.5	487.5		262.1	231.5		980.3	96.8	89.4	28.6	163.4	415.2	31.1		75	244.9	173.7		34.7	45.6	32.2	32.3	358.7	95.7	0
GCA_028583205.1_ASM2858320v1_genomic.fna_prokka_result.faa	58.1	277			363.3	115.3	64.7	40.3	15.8	503.5	101.3	1524	685.3	79.1	560.4	79.4	182.6	264.6	266.8	447.6	45.3			164.5	487.5		262.1	231.5		980.3	98.9	89.4	28.6	163.4	415.2	31.1		75	244.9	173.7		34.7	45.6	32.2	32.3	358.7	95.7	0
GCA_028583225.1_ASM2858322v1_genomic.fna_prokka_result.faa	58.1	277			363.3	115.3	64.7	40.3	15.8	503.5	101.3	1524	685.8	79.1		79.4	182.6	264.6	266.8	447.6	45.3			164.5	487.5		262.1	231.5		980.3	96.8	89.4	28.6	163.3	415.2	31.1		75	244.9	173.7		34.7	45.6	32.2	32.3	358.7	95.7	0
GCA_028583245.1_ASM2858324v1_genomic.fna_prokka_result.faa	58.1	277			363.3	115.3	64.7	40.3	15.8	503.5	101.3	1524	685.3	79.1	560.4	79.4	182.6	264.6	266.8	447.6	45.3			164.5	487.5		262.1	231.5		980.3	96.8	89.4	28.6	163.4	415.2	31.1		75	244.9	173.7		34.7	45.6	32.6	32.3	358.7	95.7	0
GCA_028583265.1_ASM2858326v1_genomic.fna_prokka_result.faa	58.1	277			363.3	115.3	64.7	40.3	15.8	503.5	101.3	1524	685.3	79.1	560.4	79.4	182.6	264.6	266.8	447.6	45.3			164.5	487.5		262.1	231.5		980.3	96.8	89.4	28.6	163.4	415.2	31.1		75	244.9	173.7		34.7	45.6	32.2	32.3	358.7	95.7	0
GCA_028583285.1_ASM2858328v1_genomic.fna_prokka_result.faa	58.1	277			363.3	115.3	64.7	40.3	15.8	503.5	101.3	1524	685.3	79.1	560.4	79.4	182.6	264.6	266.8	447.6	45.3			164.5	487.5		262.1	231.5		980.3	96.8	89.4	28.6	163.4	415.2	31.1		75	244.9	173.7		34.7	45.6	32.2	32.3	358.7	95.7	0
GCA_028583305.1_ASM2858330v1_genomic.fna_prokka_result.faa	58.1	277			363.3	115.3	64.7	40.3	15.8	503.5	101.3	1524	685.3	79.1	560.4	79.4	182.6	264.6	266.8	447.6	45.3			164.5	487.5		262.1	231.5		980.3	96.8	89.4	28.6	163.4	415.2	31.4		75	244.9	173.7		34.7	45.6	32.2	32.3	358.7	95.7	0
GCA_028752235.1_ASM2875223v1_genomic.fna_prokka_result.faa	58.8	277.9			363.1	111.9	64.1			92.7	100.7	1521	681.6	82.9	561.1	77.9	181.7	265.3	266.8	446.4	44.9	31.8		163.7	483.6		257.8	229.6		981.5	96.2	89.4	29.2	163.2	414.4	31.4		73.9	244.6	169.8		36.7	46.6	32.3	31.4	356.2	93	1
GCA_028768425.1_ASM2876842v1_genomic.fna_prokka_result.faa	58.1	277			363.3	115.3	64.7	40.3	15.8	132.8	101.3	1524	685.3	79.1	560.4	79.4	182.6	264.6	266.8	447.6	45.3			164.5	487.5		262.1	231.5		980.3	96.8	89.4	28.6	163.4	415.2	31.1		75	244.9	173.7		34.7	45.6	32.2	32.3	358.7	95.7	0
GCA_031199985.1_ASM3119998v1_genomic.fna_prokka_result.faa	58.1	277			363.3	115.3	64.7	40.3	15.8	503.5	101.3	1524	685.3	79.1	405.5	79.4	182.6	264.6	266.8	447.6	45.3			164.5	487.5		262.1	231.5		980.3	96.8	89.4	28.6	163.4	415.2	31.1		75	244.9	173.7		34.7	45.6	32.2	32.3	358.7	95.7	0
GCA_031201325.1_ASM3120132v1_genomic.fna_prokka_result.faa	58.1	277			363.3	115.3	64.7	40.3	15.8	503.5	101.3	1524	685.3	79.1	407.6	79.4	182.6	264.6	266.8	447.6	45.3			164.5	487.5		262.1	231.5		980.3	96.8	89.4	28.6	163.4	415.2	31.1		75	244.9	173.7		34.7	45.6	32.2	32.3	358.7	95.7	0
GCA_031201695.1_ASM3120169v1_genomic.fna_prokka_result.faa	39.6	277			363.3	115.3	47.8	40.3	15.8	503.5	101.3	1516.1	685.3	79.1		79.4	182.6	264.6	266.8	444.9	45.3			164.5	486.2		262.1	231.5		980.3	93.6	80	28.6	163.4	415.2	31.1		75	244.9	173.7		34.7	45.6	32.2	32.3	358.7	95.7	0
GCA_031201715.1_ASM3120171v1_genomic.fna_prokka_result.faa	58.1	277			363.3	115.3	64.7	40.3	15.8	503.5	101.3	1524	685.3	79.1	407.6	79.4	182.6	264.6	266.8	447.6	45.3			164.5	487.5		262.1	231.5		980.3	96.8	89.4	28.6	163.4	415.2	31.1		75	244.9	173.7		34.7	45.6	32.2	32.3	358.7	95.7	0
GCA_902459825.2_MB3601_COMBINED_annotated_genomic.fna_prokka_result.faa	58.1	277			363.3	115.3	64.7	40.3	15.8	503.5	101.3	1524	685.8	79.1		79.4	182.6	264.6	266.8	447.6	45.3			164.5	487.5		262.1	231.5		980.3	96.8	89.4	28.6	163.3	415.2			75	244.9	173.7		34.7	45.6	32.2	32.3	358.7	95.7	0
GCA_902506665.1_P9979_genomic.fna_prokka_result.faa	58.1	277			363.3	115.3	64.7	40.3	15.8	503.5	101.3	1524	685.3	79.1	560.4	79.4	182.6	264.6	279.6	447.6	45.3			164.5	487.5		262.1	231.5		980.3	96.8	89.4	28.6	163.4	415.2	30		75	244.9	173.7		34.7	45.6	32.2	32.3	358.7	95.7	0
GCA_902506725.1_P9980_genomic.fna_prokka_result.faa	58.1	277			363.3	115.3	64.7	40.3	15.8	503.5	101.3	1524	685.3	79.1	560.4	79.4	182.6	264.6	279.6	447.6	45.3			164.5	500.2		262.1	231.5		980.3	96.8	89.4	28.6	163.4	415.2	30		75	244.9	173.7		34.7	45.6	32.2	32.3	358.7	95.7	0
GCA_902509475.1_Q0209_genomic.fna_prokka_result.faa	58.1	277			363.3	139	64.7	19	15.8	503.5	101.3	1524	685.8	79.1		79.4	182.6	264.6	266.8	447.6	45.3			164.5	500.2		262.1	231.5		980.3	96.8	89.4	28.6	163.4	415.2	30		75	244.9	171.9		34.7	45.6	32.2	32.3	358.7	95.7	0
